# Supplementary material
Source: publisher figshare collection journal article supplement (https://acs.figshare.com/ndownloader/files/3813610)
Supplement: Supplementary file 1 [file 3813610]

  
data_10mz664_0m 


_publ_requested_journal          'Inorg. Chem.'
_publ_section_title ' Manifestation of pi-pi Stacking Interactions in Luminescence Properties and Energy Transfer in Aromatically-Derived Tb, Eu and Gd Tris(pyrazolyl)borate Complexes'
_publ_section_abstract 'The three new complexes TpPyLn(CH3CO2)2(H2O) (Ln = Eu (1), Gd(2) or Tb (3)) were prepared and characterized crystallographically. In the crystal lattices of these complexes separate molecules are connected in infinite chains by ?-stacking interactions. Complexes 1 and 3 display intense photoluminescence and triboluminescence (red and green respectively), while compound 3 exhibits electroluminescence commencing at 9 V in an ITO/PVK/3/Al device. A series of Eu/Tb-doped Gd-compounds was prepared by co-crystallization from mixtures of 1 and 2 or 2 and 3, respectively. It was shown that ?-stacking interactions are involved in increasing the efficiency of energy transfer from the gadolinium complex to emitting TpPyEu2+ or TpPyTb2+ centers and this energy transfer occurs through hundreds of molecules, resembling the process of energy harvesting in chloroplast stacks.'
_publ_contact_author_name        'Pavlishchuk, Vitaly V.'
_publ_contact_author_address     
'Institute of Physical Chemistry of NAS of Ukraine, Pr.Nauki 31,Kiev,Ukraine'
_publ_contact_author_email       shchuk@inphyschem-nas.kiev.ua
_publ_contact_author_phone       '(38 044) 525 42 28'
_publ_contact_author_fax         '(38 044) 525 62 16'

loop_
_publ_author_name
_publ_author_address
'Mikhalyova, Elena A.'
'Institute of Physical Chemistry of NAS of Ukraine, Pr.Nauki 31,Kiev,Ukraine'
'Yakovenko, Anastasiya V.'
'Institute of Physical Chemistry of NAS of Ukraine, Pr.Nauki 31,Kiev,Ukraine'
'Zeller, Matthias'
'STaRBURSTT CyberInstr.Consort.and Dpt of Chem,Youngstown State Univ-ty,OH,USA'
'Kiskin, Mikhail A. '
'N. S. Kurnakov Institute of General and Inorganic Chemistry, RAS, Leninsky Pr. 31, Moscow, GSP-1, Russian Federation '
'Kolomzarov, Yuriy V.'
'Institute of Semiconductor Physics of the NAS of Ukraine, Pr. Nauki 41, Kiev, Ukraine.'
'Eremenko, Igor L.'
'N. S. Kurnakov Institute of General and Inorganic Chemistry, RAS, Leninsky Pr. 31, Moscow, GSP-1, Russian Federation '
'Addison, Anthony W.'
'Department of Chemistry, Drexel University, Philadelphia, PA 19104-2816, USA'
'Pavlishchuk, Vitaly V.'
'Institute of Physical Chemistry of NAS of Ukraine, Pr.Nauki 31,Kiev,Ukraine'

  
_audit_creation_method            SHELXL-97 
_chemical_name_systematic 
; 
 ? 
; 
_chemical_name_common             ? 
_chemical_melting_point           ? 
_chemical_formula_moiety          'C28 H27 B Eu N9 O5, C H Cl3'  
_chemical_formula_sum 
 'C29 H28 B Cl3 Eu N9 O5' 
_chemical_formula_weight          851.72 
  
loop_ 
 _atom_type_symbol 
 _atom_type_description 
 _atom_type_scat_dispersion_real 
 _atom_type_scat_dispersion_imag 
 _atom_type_scat_source 
 'C'  'C'   0.0033   0.0016 
 'International Tables Vol C Tables 4.2.6.8 and 6.1.1.4' 
 'H'  'H'   0.0000   0.0000 
 'International Tables Vol C Tables 4.2.6.8 and 6.1.1.4' 
 'B'  'B'   0.0013   0.0007 
 'International Tables Vol C Tables 4.2.6.8 and 6.1.1.4' 
 'Cl'  'Cl'   0.1484   0.1585 
 'International Tables Vol C Tables 4.2.6.8 and 6.1.1.4' 
 'Eu'  'Eu'  -0.1578   3.6682 
 'International Tables Vol C Tables 4.2.6.8 and 6.1.1.4' 
 'N'  'N'   0.0061   0.0033 
 'International Tables Vol C Tables 4.2.6.8 and 6.1.1.4' 
 'O'  'O'   0.0106   0.0060 
 'International Tables Vol C Tables 4.2.6.8 and 6.1.1.4' 
  
_symmetry_cell_setting            Triclinic 
_space_group_IT_number            2
_symmetry_space_group_name_H-M    P-1 
_space_group_name_Hall            '-P 1'
  
loop_ 
 _symmetry_equiv_pos_as_xyz 
 'x, y, z' 
 '-x, -y, -z' 
  
_cell_length_a                    11.0530(14) 
_cell_length_b                    11.1076(14) 
_cell_length_c                    15.203(3) 
_cell_angle_alpha                 100.320(2) 
_cell_angle_beta                  101.795(2) 
_cell_angle_gamma                 106.355(2) 
_cell_volume                      1696.6(5) 
_cell_formula_units_Z             2 
_cell_measurement_temperature     100(2) 
_cell_measurement_reflns_used     9622 
_cell_measurement_theta_min       2.68 
_cell_measurement_theta_max       30.91 
  
_exptl_crystal_description        block 
_exptl_crystal_colour             colourless 
_exptl_crystal_size_max           0.55 
_exptl_crystal_size_mid           0.45 
_exptl_crystal_size_min           0.35 
_exptl_crystal_density_meas       ? 
_exptl_crystal_density_diffrn     1.667 
_exptl_crystal_density_method     'not measured' 
_exptl_crystal_F_000              848 
_exptl_absorpt_coefficient_mu     2.137 
_exptl_absorpt_correction_type    'multi-scan'
_exptl_absorpt_correction_T_min   0.5498  
_exptl_absorpt_correction_T_max   0.7462 
_exptl_absorpt_process_details    'Apex2  v2009.7-0 (Bruker, 2009)'
  
_exptl_special_details 
; 
Reflection 0 0 1 was affected by the beam stop and was omitted from the 
refinement. 
; 
  
_diffrn_ambient_temperature       100(2) 
_diffrn_radiation_wavelength      0.71073 
_diffrn_radiation_type            MoK\a 
_diffrn_radiation_source          'fine-focus sealed tube' 
_diffrn_radiation_monochromator   graphite 
_diffrn_measurement_device_type   'Bruker AXS SMART APEX CCD diffractometer'  
_diffrn_measurement_method        '\w scans' 
_diffrn_detector_area_resol_mean  ? 
_diffrn_standards_number          0 
_diffrn_standards_interval_count  . 
_diffrn_standards_interval_time   . 
_diffrn_standards_decay_%         ?
_diffrn_reflns_number             20793 
_diffrn_reflns_av_R_equivalents   0.0179 
_diffrn_reflns_av_sigmaI/netI     0.0259 
_diffrn_reflns_limit_h_min        -16 
_diffrn_reflns_limit_h_max        15 
_diffrn_reflns_limit_k_min        -16 
_diffrn_reflns_limit_k_max        15 
_diffrn_reflns_limit_l_min        -21 
_diffrn_reflns_limit_l_max        21 
_diffrn_reflns_theta_min          1.99 
_diffrn_reflns_theta_max          31.39 
_reflns_number_total              9903 
_reflns_number_gt                 9375 
_reflns_threshold_expression      >2sigma(I) 
  
_computing_data_collection        'Apex2 v2009.7-0 (Bruker, 2009)' 
_computing_cell_refinement        'Apex2 v2009.7-0' 
_computing_data_reduction         'Apex2 v2009.7-0'
_computing_structure_solution     
'SHELXTL 6.14 (Bruker, 2000-2003; Sheldrick, 2008)'  
_computing_structure_refinement   'SHELXTL 6.14' 
_computing_molecular_graphics     'SHELXTL 6.14' 
_computing_publication_material   'SHELXTL 6.14' 
  
_refine_special_details 
; 
 Refinement of F^2^ against ALL reflections.  The weighted R-factor wR and 
 goodness of fit S are based on F^2^, conventional R-factors R are based 
 on F, with F set to zero for negative F^2^. The threshold expression of 
 F^2^ > 2sigma(F^2^) is used only for calculating R-factors(gt) etc. and is 
 not relevant to the choice of reflections for refinement.  R-factors based 
 on F^2^ are statistically about twice as large as those based on F, and R- 
 factors based on ALL data will be even larger. 
; 
  
_refine_ls_structure_factor_coef  Fsqd  
_refine_ls_matrix_type            full 
_refine_ls_weighting_scheme       calc  
_refine_ls_weighting_details 
 'calc w=1/[\s^2^(Fo^2^)+(0.0260P)^2^+1.4138P] where P=(Fo^2^+2Fc^2^)/3' 
_atom_sites_solution_primary      direct 
_atom_sites_solution_secondary    difmap 
_atom_sites_solution_hydrogens    geom 
_refine_ls_hydrogen_treatment     mixed 
_refine_ls_extinction_method      none 
_refine_ls_extinction_coef        ? 
_refine_ls_number_reflns          9903 
_refine_ls_number_parameters      441 
_refine_ls_number_restraints      2 
_refine_ls_R_factor_all           0.0248 
_refine_ls_R_factor_gt            0.0229 
_refine_ls_wR_factor_ref          0.0565 
_refine_ls_wR_factor_gt           0.0551 
_refine_ls_goodness_of_fit_ref    1.030 
_refine_ls_restrained_S_all       1.030 
_refine_ls_shift/su_max           0.002 
_refine_ls_shift/su_mean          0.000 
  
loop_ 
 _atom_site_label 
 _atom_site_type_symbol 
 _atom_site_fract_x 
 _atom_site_fract_y 
 _atom_site_fract_z 
 _atom_site_U_iso_or_equiv 
 _atom_site_adp_type 
 _atom_site_occupancy 
 _atom_site_symmetry_multiplicity 
 _atom_site_calc_flag 
 _atom_site_refinement_flags 
 _atom_site_disorder_assembly 
 _atom_site_disorder_group 
B1 B 0.4066(2) 0.4017(2) 0.13411(15) 0.0180(4) Uani 1 1 d . . . 
H1C H 0.3822 0.4598 0.0956 0.022 Uiso 1 1 calc R . . 
C1 C 0.51254(19) 0.32222(19) 0.00660(13) 0.0209(4) Uani 1 1 d . . . 
H1 H 0.4926 0.3736 -0.0343 0.025 Uiso 1 1 calc R . . 
C2 C 0.57968(19) 0.23644(19) -0.00659(13) 0.0213(4) Uani 1 1 d . . . 
H2 H 0.6153 0.2168 -0.0570 0.026 Uiso 1 1 calc R . . 
C3 C 0.58367(17) 0.18455(18) 0.07108(12) 0.0175(3) Uani 1 1 d . . . 
C4 C 0.63939(17) 0.08647(17) 0.09587(13) 0.0181(3) Uani 1 1 d . . . 
C5 C 0.70818(19) 0.03374(19) 0.04095(14) 0.0230(4) Uani 1 1 d . . . 
H5 H 0.7185 0.0597 -0.0140 0.028 Uiso 1 1 calc R . . 
C6 C 0.7608(2) -0.0570(2) 0.06836(15) 0.0266(4) Uani 1 1 d . . . 
H6 H 0.8095 -0.0932 0.0331 0.032 Uiso 1 1 calc R . . 
C7 C 0.7414(2) -0.0942(2) 0.14791(15) 0.0264(4) Uani 1 1 d . . . 
H7 H 0.7771 -0.1560 0.1684 0.032 Uiso 1 1 calc R . . 
C8 C 0.6689(2) -0.03966(19) 0.19715(14) 0.0230(4) Uani 1 1 d . . . 
H8 H 0.6538 -0.0677 0.2506 0.028 Uiso 1 1 calc R . . 
C9 C 0.53298(19) 0.61066(18) 0.27102(14) 0.0208(4) Uani 1 1 d . . . 
H9 H 0.5177 0.6744 0.2402 0.025 Uiso 1 1 calc R . . 
C10 C 0.59742(19) 0.63370(18) 0.36335(14) 0.0222(4) Uani 1 1 d . . . 
H10 H 0.6361 0.7148 0.4082 0.027 Uiso 1 1 calc R . . 
C11 C 0.59305(17) 0.51065(17) 0.37624(13) 0.0170(3) Uani 1 1 d . . . 
C12 C 0.63217(17) 0.46743(18) 0.45982(13) 0.0176(3) Uani 1 1 d . . . 
C13 C 0.70317(19) 0.5549(2) 0.54453(14) 0.0224(4) Uani 1 1 d . . . 
H13 H 0.7283 0.6456 0.5497 0.027 Uiso 1 1 calc R . . 
C14 C 0.7371(2) 0.5083(2) 0.62167(14) 0.0250(4) Uani 1 1 d . . . 
H14 H 0.7857 0.5667 0.6802 0.030 Uiso 1 1 calc R . . 
C15 C 0.6992(2) 0.3763(2) 0.61211(14) 0.0243(4) Uani 1 1 d . . . 
H15 H 0.7224 0.3418 0.6634 0.029 Uiso 1 1 calc R . . 
C16 C 0.62620(19) 0.2952(2) 0.52563(13) 0.0217(4) Uani 1 1 d . . . 
H16 H 0.5991 0.2043 0.5195 0.026 Uiso 1 1 calc R . . 
C17 C 0.15555(18) 0.29454(19) 0.11713(13) 0.0203(3) Uani 1 1 d . . . 
H17 H 0.1203 0.3352 0.0732 0.024 Uiso 1 1 calc R . . 
C18 C 0.08459(18) 0.21209(19) 0.16044(14) 0.0208(4) Uani 1 1 d . . . 
H18 H -0.0074 0.1840 0.1524 0.025 Uiso 1 1 calc R . . 
C19 C 0.17914(17) 0.17929(17) 0.21904(12) 0.0165(3) Uani 1 1 d . . . 
C20 C 0.17101(18) 0.11028(17) 0.29225(13) 0.0173(3) Uani 1 1 d . . . 
C21 C 0.05219(19) 0.0576(2) 0.31164(14) 0.0237(4) Uani 1 1 d . . . 
H21 H -0.0266 0.0625 0.2757 0.028 Uiso 1 1 calc R . . 
C22 C 0.0507(2) -0.0022(2) 0.38416(16) 0.0289(4) Uani 1 1 d . . . 
H22 H -0.0291 -0.0386 0.3987 0.035 Uiso 1 1 calc R . . 
C23 C 0.1668(2) -0.0081(2) 0.43517(15) 0.0272(4) Uani 1 1 d . . . 
H23 H 0.1684 -0.0493 0.4848 0.033 Uiso 1 1 calc R . . 
C24 C 0.2815(2) 0.04806(19) 0.41174(13) 0.0216(4) Uani 1 1 d . . . 
H24 H 0.3612 0.0440 0.4469 0.026 Uiso 1 1 calc R . . 
C25 C 0.3086(2) -0.13369(19) 0.20369(14) 0.0222(4) Uani 1 1 d . . . 
C26 C 0.1708(2) -0.2224(2) 0.15176(19) 0.0370(5) Uani 1 1 d . . . 
H26A H 0.1666 -0.3129 0.1458 0.056 Uiso 1 1 calc R . . 
H26B H 0.1475 -0.2076 0.0898 0.056 Uiso 1 1 calc R . . 
H26C H 0.1093 -0.2041 0.1860 0.056 Uiso 1 1 calc R . . 
C27 C 0.81782(19) 0.2437(2) 0.37226(14) 0.0221(4) Uani 1 1 d . . . 
C28 C 0.9556(2) 0.3354(3) 0.4039(2) 0.0404(6) Uani 1 1 d . . . 
H28A H 1.0022 0.3199 0.4606 0.061 Uiso 1 1 calc R . . 
H28B H 0.9549 0.4248 0.4165 0.061 Uiso 1 1 calc R . . 
H28C H 0.9999 0.3215 0.3552 0.061 Uiso 1 1 calc R . . 
C29 C 0.8413(2) 0.5204(2) 0.22368(18) 0.0322(5) Uani 1 1 d . . . 
H29 H 0.7675 0.4611 0.2401 0.039 Uiso 1 1 calc R . . 
Cl1 Cl 0.77611(6) 0.58482(6) 0.13462(6) 0.04616(16) Uani 1 1 d . . . 
Cl2 Cl 0.93659(7) 0.43127(6) 0.18422(5) 0.04124(14) Uani 1 1 d . . . 
Cl3 Cl 0.93601(8) 0.64508(7) 0.32248(6) 0.05099(17) Uani 1 1 d . . . 
Eu1 Eu 0.499242(8) 0.181280(8) 0.277195(6) 0.01357(3) Uani 1 1 d . . . 
N1 N 0.47968(15) 0.32140(15) 0.08702(11) 0.0172(3) Uani 1 1 d . . . 
N2 N 0.52282(15) 0.23652(15) 0.12756(10) 0.0164(3) Uani 1 1 d . . . 
N3 N 0.61913(15) 0.05043(15) 0.17329(11) 0.0190(3) Uani 1 1 d . . . 
N4 N 0.49520(15) 0.48211(15) 0.23177(11) 0.0171(3) Uani 1 1 d . . . 
N5 N 0.53322(15) 0.42015(14) 0.29596(11) 0.0162(3) Uani 1 1 d . . . 
N6 N 0.59153(15) 0.33739(15) 0.45001(11) 0.0178(3) Uani 1 1 d . . . 
N7 N 0.28313(15) 0.30756(15) 0.14758(11) 0.0172(3) Uani 1 1 d . . . 
N8 N 0.29764(15) 0.23471(15) 0.20915(11) 0.0168(3) Uani 1 1 d . . . 
N9 N 0.28584(15) 0.10730(15) 0.34267(11) 0.0174(3) Uani 1 1 d . . . 
O1 O 0.54667(14) 0.04113(14) 0.37240(10) 0.0212(3) Uani 1 1 d D . . 
H1A H 0.499(2) -0.0348(19) 0.3385(17) 0.032 Uiso 1 1 d D . . 
H1B H 0.6277(17) 0.062(3) 0.3829(19) 0.032 Uiso 1 1 d D . . 
O2 O 0.34437(13) -0.02310(13) 0.18734(9) 0.0196(3) Uani 1 1 d . . . 
O3 O 0.37739(16) -0.17397(14) 0.25942(12) 0.0297(3) Uani 1 1 d . . . 
O4 O 0.73198(13) 0.27775(13) 0.32332(9) 0.0199(3) Uani 1 1 d . . . 
O5 O 0.79688(15) 0.13878(16) 0.39572(11) 0.0284(3) Uani 1 1 d . . . 
 
loop_ 
 _atom_site_aniso_label 
 _atom_site_aniso_U_11 
 _atom_site_aniso_U_22 
 _atom_site_aniso_U_33 
 _atom_site_aniso_U_23 
 _atom_site_aniso_U_13 
 _atom_site_aniso_U_12 
B1 0.0188(9) 0.0170(9) 0.0204(9) 0.0071(7) 0.0050(7) 0.0077(7) 
C1 0.0236(9) 0.0213(9) 0.0175(8) 0.0069(7) 0.0065(7) 0.0048(7) 
C2 0.0230(9) 0.0219(9) 0.0181(8) 0.0035(7) 0.0091(7) 0.0044(7) 
C3 0.0150(8) 0.0180(8) 0.0165(8) 0.0012(6) 0.0043(6) 0.0029(6) 
C4 0.0134(7) 0.0166(8) 0.0197(8) -0.0009(6) 0.0025(6) 0.0028(6) 
C5 0.0191(9) 0.0225(9) 0.0234(9) -0.0024(7) 0.0064(7) 0.0055(7) 
C6 0.0189(9) 0.0245(9) 0.0309(10) -0.0059(8) 0.0042(8) 0.0086(8) 
C7 0.0223(9) 0.0216(9) 0.0318(11) -0.0007(8) 0.0015(8) 0.0106(8) 
C8 0.0237(9) 0.0196(8) 0.0230(9) 0.0018(7) 0.0020(7) 0.0084(7) 
C9 0.0231(9) 0.0147(8) 0.0272(9) 0.0068(7) 0.0099(7) 0.0072(7) 
C10 0.0230(9) 0.0154(8) 0.0264(10) 0.0007(7) 0.0062(7) 0.0067(7) 
C11 0.0151(8) 0.0161(8) 0.0196(8) 0.0021(6) 0.0050(6) 0.0060(6) 
C12 0.0140(7) 0.0201(8) 0.0191(8) 0.0026(7) 0.0051(6) 0.0070(7) 
C13 0.0199(9) 0.0217(9) 0.0219(9) -0.0005(7) 0.0038(7) 0.0062(7) 
C14 0.0214(9) 0.0301(10) 0.0176(9) -0.0017(8) 0.0017(7) 0.0067(8) 
C15 0.0228(9) 0.0331(11) 0.0179(9) 0.0068(8) 0.0056(7) 0.0102(8) 
C16 0.0219(9) 0.0244(9) 0.0196(9) 0.0066(7) 0.0065(7) 0.0076(7) 
C17 0.0192(8) 0.0210(8) 0.0213(9) 0.0052(7) 0.0025(7) 0.0097(7) 
C18 0.0158(8) 0.0215(9) 0.0242(9) 0.0045(7) 0.0028(7) 0.0071(7) 
C19 0.0151(8) 0.0158(8) 0.0178(8) 0.0027(6) 0.0036(6) 0.0057(6) 
C20 0.0179(8) 0.0157(8) 0.0183(8) 0.0029(6) 0.0062(6) 0.0055(6) 
C21 0.0172(8) 0.0270(10) 0.0259(10) 0.0064(8) 0.0068(7) 0.0053(7) 
C22 0.0243(10) 0.0332(11) 0.0310(11) 0.0118(9) 0.0145(8) 0.0050(9) 
C23 0.0302(10) 0.0324(11) 0.0248(10) 0.0137(8) 0.0137(8) 0.0105(9) 
C24 0.0241(9) 0.0236(9) 0.0197(9) 0.0075(7) 0.0075(7) 0.0092(8) 
C25 0.0242(9) 0.0176(8) 0.0258(9) 0.0035(7) 0.0124(7) 0.0058(7) 
C26 0.0282(11) 0.0294(11) 0.0437(14) 0.0090(10) 0.0088(10) -0.0043(9) 
C27 0.0182(8) 0.0272(9) 0.0203(9) 0.0035(7) 0.0045(7) 0.0085(7) 
C28 0.0230(11) 0.0376(13) 0.0523(16) 0.0139(12) -0.0033(10) 0.0053(10) 
C29 0.0268(10) 0.0234(10) 0.0498(14) 0.0084(10) 0.0153(10) 0.0104(9) 
Cl1 0.0337(3) 0.0320(3) 0.0702(5) 0.0160(3) 0.0017(3) 0.0138(2) 
Cl2 0.0467(3) 0.0411(3) 0.0511(4) 0.0142(3) 0.0216(3) 0.0301(3) 
Cl3 0.0519(4) 0.0418(4) 0.0525(4) -0.0025(3) 0.0135(3) 0.0146(3) 
Eu1 0.01432(4) 0.01328(4) 0.01438(4) 0.00434(3) 0.00419(3) 0.00570(3) 
N1 0.0194(7) 0.0174(7) 0.0166(7) 0.0066(6) 0.0058(6) 0.0065(6) 
N2 0.0186(7) 0.0154(7) 0.0159(7) 0.0034(5) 0.0052(5) 0.0069(6) 
N3 0.0179(7) 0.0168(7) 0.0201(7) 0.0014(6) 0.0036(6) 0.0057(6) 
N4 0.0194(7) 0.0148(7) 0.0191(7) 0.0061(6) 0.0063(6) 0.0070(6) 
N5 0.0177(7) 0.0145(7) 0.0178(7) 0.0048(6) 0.0043(5) 0.0071(6) 
N6 0.0173(7) 0.0191(7) 0.0173(7) 0.0029(6) 0.0056(6) 0.0068(6) 
N7 0.0176(7) 0.0179(7) 0.0189(7) 0.0075(6) 0.0050(6) 0.0082(6) 
N8 0.0172(7) 0.0170(7) 0.0180(7) 0.0069(6) 0.0051(5) 0.0070(6) 
N9 0.0183(7) 0.0177(7) 0.0177(7) 0.0045(6) 0.0064(6) 0.0068(6) 
O1 0.0230(7) 0.0214(7) 0.0224(7) 0.0089(5) 0.0059(5) 0.0104(6) 
O2 0.0215(6) 0.0161(6) 0.0203(6) 0.0038(5) 0.0071(5) 0.0047(5) 
O3 0.0347(8) 0.0202(7) 0.0368(9) 0.0110(6) 0.0100(7) 0.0103(6) 
O4 0.0154(6) 0.0242(7) 0.0197(6) 0.0040(5) 0.0041(5) 0.0074(5) 
O5 0.0251(7) 0.0332(8) 0.0299(8) 0.0135(6) 0.0054(6) 0.0123(6) 
 
_geom_special_details 
; 
 All esds (except the esd in the dihedral angle between two l.s. planes) 
 are estimated using the full covariance matrix.  The cell esds are taken 
 into account individually in the estimation of esds in distances, angles 
 and torsion angles; correlations between esds in cell parameters are only 
 used when they are defined by crystal symmetry.  An approximate (isotropic) 
 treatment of cell esds is used for estimating esds involving l.s. planes. 
; 
 
loop_ 
 _geom_bond_atom_site_label_1 
 _geom_bond_atom_site_label_2 
 _geom_bond_distance 
 _geom_bond_site_symmetry_2 
 _geom_bond_publ_flag 
B1 N1 1.541(3) . ? 
B1 N7 1.544(3) . ? 
B1 N4 1.549(3) . ? 
B1 H1C 1.0000 . ? 
C1 N1 1.346(2) . ? 
C1 C2 1.374(3) . ? 
C1 H1 0.9500 . ? 
C2 C3 1.402(3) . ? 
C2 H2 0.9500 . ? 
C3 N2 1.342(2) . ? 
C3 C4 1.462(3) . ? 
C4 N3 1.350(2) . ? 
C4 C5 1.398(3) . ? 
C5 C6 1.381(3) . ? 
C5 H5 0.9500 . ? 
C6 C7 1.384(3) . ? 
C6 H6 0.9500 . ? 
C7 C8 1.388(3) . ? 
C7 H7 0.9500 . ? 
C8 N3 1.340(2) . ? 
C8 H8 0.9500 . ? 
C9 N4 1.351(2) . ? 
C9 C10 1.379(3) . ? 
C9 H9 0.9500 . ? 
C10 C11 1.404(3) . ? 
C10 H10 0.9500 . ? 
C11 N5 1.339(2) . ? 
C11 C12 1.464(3) . ? 
C12 N6 1.357(2) . ? 
C12 C13 1.388(3) . ? 
C13 C14 1.389(3) . ? 
C13 H13 0.9500 . ? 
C14 C15 1.378(3) . ? 
C14 H14 0.9500 . ? 
C15 C16 1.387(3) . ? 
C15 H15 0.9500 . ? 
C16 N6 1.342(2) . ? 
C16 H16 0.9500 . ? 
C17 N7 1.348(2) . ? 
C17 C18 1.382(3) . ? 
C17 H17 0.9500 . ? 
C18 C19 1.403(3) . ? 
C18 H18 0.9500 . ? 
C19 N8 1.333(2) . ? 
C19 C20 1.464(3) . ? 
C20 N9 1.354(2) . ? 
C20 C21 1.393(3) . ? 
C21 C22 1.385(3) . ? 
C21 H21 0.9500 . ? 
C22 C23 1.383(3) . ? 
C22 H22 0.9500 . ? 
C23 C24 1.393(3) . ? 
C23 H23 0.9500 . ? 
C24 N9 1.337(2) . ? 
C24 H24 0.9500 . ? 
C25 O3 1.249(3) . ? 
C25 O2 1.266(2) . ? 
C25 C26 1.516(3) . ? 
C26 H26A 0.9800 . ? 
C26 H26B 0.9800 . ? 
C26 H26C 0.9800 . ? 
C27 O5 1.253(3) . ? 
C27 O4 1.269(2) . ? 
C27 C28 1.496(3) . ? 
C28 H28A 0.9800 . ? 
C28 H28B 0.9800 . ? 
C28 H28C 0.9800 . ? 
C29 Cl3 1.751(3) . ? 
C29 Cl2 1.756(2) . ? 
C29 Cl1 1.762(3) . ? 
C29 H29 1.0000 . ? 
Eu1 O2 2.3863(13) . ? 
Eu1 O4 2.3871(13) . ? 
Eu1 O1 2.3979(14) . ? 
Eu1 N2 2.5044(16) . ? 
Eu1 N5 2.5271(15) . ? 
Eu1 N8 2.5319(15) . ? 
Eu1 N6 2.6882(16) . ? 
Eu1 N9 2.7186(15) . ? 
Eu1 N3 2.7353(16) . ? 
Eu1 H1A 2.73(3) . ? 
Eu1 H1B 2.69(3) . ? 
N1 N2 1.356(2) . ? 
N4 N5 1.356(2) . ? 
N7 N8 1.356(2) . ? 
O1 H1A 0.858(17) . ? 
O1 H1B 0.832(17) . ? 
 
loop_ 
 _geom_angle_atom_site_label_1 
 _geom_angle_atom_site_label_2 
 _geom_angle_atom_site_label_3 
 _geom_angle 
 _geom_angle_site_symmetry_1 
 _geom_angle_site_symmetry_3 
 _geom_angle_publ_flag 
N1 B1 N7 108.52(15) . . ? 
N1 B1 N4 108.96(15) . . ? 
N7 B1 N4 107.43(15) . . ? 
N1 B1 H1C 110.6 . . ? 
N7 B1 H1C 110.6 . . ? 
N4 B1 H1C 110.6 . . ? 
N1 C1 C2 108.73(17) . . ? 
N1 C1 H1 125.6 . . ? 
C2 C1 H1 125.6 . . ? 
C1 C2 C3 104.45(16) . . ? 
C1 C2 H2 127.8 . . ? 
C3 C2 H2 127.8 . . ? 
N2 C3 C2 110.42(17) . . ? 
N2 C3 C4 119.07(16) . . ? 
C2 C3 C4 130.49(17) . . ? 
N3 C4 C5 122.99(18) . . ? 
N3 C4 C3 116.11(16) . . ? 
C5 C4 C3 120.90(18) . . ? 
C6 C5 C4 118.6(2) . . ? 
C6 C5 H5 120.7 . . ? 
C4 C5 H5 120.7 . . ? 
C5 C6 C7 119.03(19) . . ? 
C5 C6 H6 120.5 . . ? 
C7 C6 H6 120.5 . . ? 
C6 C7 C8 118.75(19) . . ? 
C6 C7 H7 120.6 . . ? 
C8 C7 H7 120.6 . . ? 
N3 C8 C7 123.5(2) . . ? 
N3 C8 H8 118.3 . . ? 
C7 C8 H8 118.3 . . ? 
N4 C9 C10 108.48(16) . . ? 
N4 C9 H9 125.8 . . ? 
C10 C9 H9 125.8 . . ? 
C9 C10 C11 104.61(17) . . ? 
C9 C10 H10 127.7 . . ? 
C11 C10 H10 127.7 . . ? 
N5 C11 C10 110.20(17) . . ? 
N5 C11 C12 117.91(16) . . ? 
C10 C11 C12 131.71(17) . . ? 
N6 C12 C13 122.23(18) . . ? 
N6 C12 C11 116.01(16) . . ? 
C13 C12 C11 121.73(17) . . ? 
C12 C13 C14 119.24(19) . . ? 
C12 C13 H13 120.4 . . ? 
C14 C13 H13 120.4 . . ? 
C15 C14 C13 119.09(18) . . ? 
C15 C14 H14 120.5 . . ? 
C13 C14 H14 120.5 . . ? 
C14 C15 C16 118.28(19) . . ? 
C14 C15 H15 120.9 . . ? 
C16 C15 H15 120.9 . . ? 
N6 C16 C15 123.94(19) . . ? 
N6 C16 H16 118.0 . . ? 
C15 C16 H16 118.0 . . ? 
N7 C17 C18 108.62(16) . . ? 
N7 C17 H17 125.7 . . ? 
C18 C17 H17 125.7 . . ? 
C17 C18 C19 104.36(16) . . ? 
C17 C18 H18 127.8 . . ? 
C19 C18 H18 127.8 . . ? 
N8 C19 C18 110.31(16) . . ? 
N8 C19 C20 117.57(16) . . ? 
C18 C19 C20 131.73(17) . . ? 
N9 C20 C21 122.47(17) . . ? 
N9 C20 C19 116.18(16) . . ? 
C21 C20 C19 121.25(17) . . ? 
C22 C21 C20 118.94(19) . . ? 
C22 C21 H21 120.5 . . ? 
C20 C21 H21 120.5 . . ? 
C23 C22 C21 119.25(19) . . ? 
C23 C22 H22 120.4 . . ? 
C21 C22 H22 120.4 . . ? 
C22 C23 C24 118.15(19) . . ? 
C22 C23 H23 120.9 . . ? 
C24 C23 H23 120.9 . . ? 
N9 C24 C23 123.82(19) . . ? 
N9 C24 H24 118.1 . . ? 
C23 C24 H24 118.1 . . ? 
O3 C25 O2 125.06(19) . . ? 
O3 C25 C26 118.18(19) . . ? 
O2 C25 C26 116.75(19) . . ? 
C25 C26 H26A 109.5 . . ? 
C25 C26 H26B 109.5 . . ? 
H26A C26 H26B 109.5 . . ? 
C25 C26 H26C 109.5 . . ? 
H26A C26 H26C 109.5 . . ? 
H26B C26 H26C 109.5 . . ? 
O5 C27 O4 125.29(19) . . ? 
O5 C27 C28 117.14(19) . . ? 
O4 C27 C28 117.57(19) . . ? 
C27 C28 H28A 109.5 . . ? 
C27 C28 H28B 109.5 . . ? 
H28A C28 H28B 109.5 . . ? 
C27 C28 H28C 109.5 . . ? 
H28A C28 H28C 109.5 . . ? 
H28B C28 H28C 109.5 . . ? 
Cl3 C29 Cl2 110.32(13) . . ? 
Cl3 C29 Cl1 110.33(12) . . ? 
Cl2 C29 Cl1 109.41(14) . . ? 
Cl3 C29 H29 108.9 . . ? 
Cl2 C29 H29 108.9 . . ? 
Cl1 C29 H29 108.9 . . ? 
O2 Eu1 O4 136.35(5) . . ? 
O2 Eu1 O1 78.87(5) . . ? 
O4 Eu1 O1 82.51(5) . . ? 
O2 Eu1 N2 87.77(5) . . ? 
O4 Eu1 N2 83.01(5) . . ? 
O1 Eu1 N2 141.73(5) . . ? 
O2 Eu1 N5 139.23(5) . . ? 
O4 Eu1 N5 76.76(5) . . ? 
O1 Eu1 N5 137.92(5) . . ? 
N2 Eu1 N5 71.32(5) . . ? 
O2 Eu1 N8 75.80(5) . . ? 
O4 Eu1 N8 139.44(5) . . ? 
O1 Eu1 N8 135.44(5) . . ? 
N2 Eu1 N8 73.01(5) . . ? 
N5 Eu1 N8 64.88(5) . . ? 
O2 Eu1 N6 142.46(5) . . ? 
O4 Eu1 N6 66.97(5) . . ? 
O1 Eu1 N6 76.28(5) . . ? 
N2 Eu1 N6 128.58(5) . . ? 
N5 Eu1 N6 62.00(5) . . ? 
N8 Eu1 N6 103.51(5) . . ? 
O2 Eu1 N9 67.02(5) . . ? 
O4 Eu1 N9 143.49(5) . . ? 
O1 Eu1 N9 75.31(5) . . ? 
N2 Eu1 N9 131.48(5) . . ? 
N5 Eu1 N9 100.93(5) . . ? 
N8 Eu1 N9 61.22(5) . . ? 
N6 Eu1 N9 79.68(5) . . ? 
O2 Eu1 N3 70.73(5) . . ? 
O4 Eu1 N3 67.27(5) . . ? 
O1 Eu1 N3 79.64(5) . . ? 
N2 Eu1 N3 62.09(5) . . ? 
N5 Eu1 N3 123.12(5) . . ? 
N8 Eu1 N3 123.83(5) . . ? 
N6 Eu1 N3 130.30(5) . . ? 
N9 Eu1 N3 134.02(5) . . ? 
O2 Eu1 H1A 61.2(4) . . ? 
O4 Eu1 H1A 94.8(5) . . ? 
O1 Eu1 H1A 17.8(4) . . ? 
N2 Eu1 H1A 131.7(5) . . ? 
N5 Eu1 H1A 154.9(5) . . ? 
N8 Eu1 H1A 125.6(5) . . ? 
N6 Eu1 H1A 93.0(5) . . ? 
N9 Eu1 H1A 71.8(6) . . ? 
N3 Eu1 H1A 72.6(6) . . ? 
O2 Eu1 H1B 90.6(5) . . ? 
O4 Eu1 H1B 65.1(4) . . ? 
O1 Eu1 H1B 17.7(4) . . ? 
N2 Eu1 H1B 130.6(5) . . ? 
N5 Eu1 H1B 129.7(5) . . ? 
N8 Eu1 H1B 152.9(4) . . ? 
N6 Eu1 H1B 73.2(6) . . ? 
N9 Eu1 H1B 92.0(4) . . ? 
N3 Eu1 H1B 70.9(6) . . ? 
H1A Eu1 H1B 31.2(6) . . ? 
C1 N1 N2 110.13(15) . . ? 
C1 N1 B1 129.21(16) . . ? 
N2 N1 B1 120.66(14) . . ? 
C3 N2 N1 106.27(15) . . ? 
C3 N2 Eu1 124.82(12) . . ? 
N1 N2 Eu1 128.91(11) . . ? 
C8 N3 C4 117.14(17) . . ? 
C8 N3 Eu1 124.97(13) . . ? 
C4 N3 Eu1 117.67(12) . . ? 
C9 N4 N5 109.89(15) . . ? 
C9 N4 B1 130.16(16) . . ? 
N5 N4 B1 119.50(15) . . ? 
C11 N5 N4 106.78(15) . . ? 
C11 N5 Eu1 124.15(12) . . ? 
N4 N5 Eu1 129.06(11) . . ? 
C16 N6 C12 117.20(16) . . ? 
C16 N6 Eu1 122.97(13) . . ? 
C12 N6 Eu1 118.17(12) . . ? 
C17 N7 N8 109.65(15) . . ? 
C17 N7 B1 130.72(16) . . ? 
N8 N7 B1 118.97(15) . . ? 
C19 N8 N7 107.01(15) . . ? 
C19 N8 Eu1 124.09(12) . . ? 
N7 N8 Eu1 128.33(11) . . ? 
C24 N9 C20 117.34(16) . . ? 
C24 N9 Eu1 124.11(12) . . ? 
C20 N9 Eu1 117.53(11) . . ? 
Eu1 O1 H1A 103.3(19) . . ? 
Eu1 O1 H1B 101.3(19) . . ? 
H1A O1 H1B 119(3) . . ? 
C25 O2 Eu1 132.94(13) . . ? 
C27 O4 Eu1 129.38(13) . . ? 
 
loop_ 
 _geom_torsion_atom_site_label_1 
 _geom_torsion_atom_site_label_2 
 _geom_torsion_atom_site_label_3 
 _geom_torsion_atom_site_label_4 
 _geom_torsion 
 _geom_torsion_site_symmetry_1 
 _geom_torsion_site_symmetry_2 
 _geom_torsion_site_symmetry_3 
 _geom_torsion_site_symmetry_4 
 _geom_torsion_publ_flag 
N1 C1 C2 C3 0.3(2) . . . . ? 
C1 C2 C3 N2 -0.2(2) . . . . ? 
C1 C2 C3 C4 178.62(18) . . . . ? 
N2 C3 C4 N3 3.2(2) . . . . ? 
C2 C3 C4 N3 -175.51(19) . . . . ? 
N2 C3 C4 C5 -177.38(17) . . . . ? 
C2 C3 C4 C5 3.9(3) . . . . ? 
N3 C4 C5 C6 -1.7(3) . . . . ? 
C3 C4 C5 C6 178.89(17) . . . . ? 
C4 C5 C6 C7 1.3(3) . . . . ? 
C5 C6 C7 C8 0.4(3) . . . . ? 
C6 C7 C8 N3 -1.9(3) . . . . ? 
N4 C9 C10 C11 -1.0(2) . . . . ? 
C9 C10 C11 N5 1.8(2) . . . . ? 
C9 C10 C11 C12 -173.11(18) . . . . ? 
N5 C11 C12 N6 -6.8(2) . . . . ? 
C10 C11 C12 N6 167.80(19) . . . . ? 
N5 C11 C12 C13 175.16(17) . . . . ? 
C10 C11 C12 C13 -10.3(3) . . . . ? 
N6 C12 C13 C14 1.7(3) . . . . ? 
C11 C12 C13 C14 179.68(17) . . . . ? 
C12 C13 C14 C15 0.0(3) . . . . ? 
C13 C14 C15 C16 -1.2(3) . . . . ? 
C14 C15 C16 N6 1.0(3) . . . . ? 
N7 C17 C18 C19 0.8(2) . . . . ? 
C17 C18 C19 N8 -1.9(2) . . . . ? 
C17 C18 C19 C20 170.52(19) . . . . ? 
N8 C19 C20 N9 -1.1(2) . . . . ? 
C18 C19 C20 N9 -173.11(19) . . . . ? 
N8 C19 C20 C21 175.38(17) . . . . ? 
C18 C19 C20 C21 3.4(3) . . . . ? 
N9 C20 C21 C22 -1.1(3) . . . . ? 
C19 C20 C21 C22 -177.37(19) . . . . ? 
C20 C21 C22 C23 -0.1(3) . . . . ? 
C21 C22 C23 C24 0.7(3) . . . . ? 
C22 C23 C24 N9 -0.1(3) . . . . ? 
C2 C1 N1 N2 -0.3(2) . . . . ? 
C2 C1 N1 B1 178.64(18) . . . . ? 
N7 B1 N1 C1 122.2(2) . . . . ? 
N4 B1 N1 C1 -121.1(2) . . . . ? 
N7 B1 N1 N2 -59.0(2) . . . . ? 
N4 B1 N1 N2 57.7(2) . . . . ? 
C2 C3 N2 N1 0.0(2) . . . . ? 
C4 C3 N2 N1 -178.96(15) . . . . ? 
C2 C3 N2 Eu1 -179.90(12) . . . . ? 
C4 C3 N2 Eu1 1.1(2) . . . . ? 
C1 N1 N2 C3 0.2(2) . . . . ? 
B1 N1 N2 C3 -178.86(16) . . . . ? 
C1 N1 N2 Eu1 -179.92(12) . . . . ? 
B1 N1 N2 Eu1 1.0(2) . . . . ? 
O2 Eu1 N2 C3 -72.05(14) . . . . ? 
O4 Eu1 N2 C3 65.21(14) . . . . ? 
O1 Eu1 N2 C3 -3.23(18) . . . . ? 
N5 Eu1 N2 C3 143.54(15) . . . . ? 
N8 Eu1 N2 C3 -147.88(15) . . . . ? 
N6 Eu1 N2 C3 118.18(14) . . . . ? 
N9 Eu1 N2 C3 -128.27(14) . . . . ? 
N3 Eu1 N2 C3 -2.73(13) . . . . ? 
O2 Eu1 N2 N1 108.08(15) . . . . ? 
O4 Eu1 N2 N1 -114.67(15) . . . . ? 
O1 Eu1 N2 N1 176.90(12) . . . . ? 
N5 Eu1 N2 N1 -36.33(14) . . . . ? 
N8 Eu1 N2 N1 32.25(14) . . . . ? 
N6 Eu1 N2 N1 -61.69(16) . . . . ? 
N9 Eu1 N2 N1 51.85(16) . . . . ? 
N3 Eu1 N2 N1 177.39(16) . . . . ? 
C7 C8 N3 C4 1.5(3) . . . . ? 
C7 C8 N3 Eu1 -172.83(15) . . . . ? 
C5 C4 N3 C8 0.3(3) . . . . ? 
C3 C4 N3 C8 179.77(16) . . . . ? 
C5 C4 N3 Eu1 175.10(14) . . . . ? 
C3 C4 N3 Eu1 -5.5(2) . . . . ? 
O2 Eu1 N3 C8 -83.44(15) . . . . ? 
O4 Eu1 N3 C8 84.43(15) . . . . ? 
O1 Eu1 N3 C8 -1.72(15) . . . . ? 
N2 Eu1 N3 C8 178.59(17) . . . . ? 
N5 Eu1 N3 C8 139.69(14) . . . . ? 
N8 Eu1 N3 C8 -140.27(14) . . . . ? 
N6 Eu1 N3 C8 60.16(17) . . . . ? 
N9 Eu1 N3 C8 -59.38(17) . . . . ? 
O2 Eu1 N3 C4 102.26(13) . . . . ? 
O4 Eu1 N3 C4 -89.86(13) . . . . ? 
O1 Eu1 N3 C4 -176.02(14) . . . . ? 
N2 Eu1 N3 C4 4.30(12) . . . . ? 
N5 Eu1 N3 C4 -34.61(15) . . . . ? 
N8 Eu1 N3 C4 45.44(14) . . . . ? 
N6 Eu1 N3 C4 -114.13(13) . . . . ? 
N9 Eu1 N3 C4 126.33(12) . . . . ? 
C10 C9 N4 N5 0.0(2) . . . . ? 
C10 C9 N4 B1 172.06(18) . . . . ? 
N1 B1 N4 C9 127.01(19) . . . . ? 
N7 B1 N4 C9 -115.6(2) . . . . ? 
N1 B1 N4 N5 -61.6(2) . . . . ? 
N7 B1 N4 N5 55.8(2) . . . . ? 
C10 C11 N5 N4 -1.8(2) . . . . ? 
C12 C11 N5 N4 173.87(15) . . . . ? 
C10 C11 N5 Eu1 179.38(12) . . . . ? 
C12 C11 N5 Eu1 -5.0(2) . . . . ? 
C9 N4 N5 C11 1.1(2) . . . . ? 
B1 N4 N5 C11 -171.92(15) . . . . ? 
C9 N4 N5 Eu1 179.87(12) . . . . ? 
B1 N4 N5 Eu1 6.8(2) . . . . ? 
O2 Eu1 N5 C11 147.80(12) . . . . ? 
O4 Eu1 N5 C11 -62.27(14) . . . . ? 
O1 Eu1 N5 C11 0.30(17) . . . . ? 
N2 Eu1 N5 C11 -149.26(15) . . . . ? 
N8 Eu1 N5 C11 131.23(15) . . . . ? 
N6 Eu1 N5 C11 8.45(13) . . . . ? 
N9 Eu1 N5 C11 80.43(14) . . . . ? 
N3 Eu1 N5 C11 -113.41(14) . . . . ? 
O2 Eu1 N5 N4 -30.75(17) . . . . ? 
O4 Eu1 N5 N4 119.18(15) . . . . ? 
O1 Eu1 N5 N4 -178.25(12) . . . . ? 
N2 Eu1 N5 N4 32.19(14) . . . . ? 
N8 Eu1 N5 N4 -47.32(14) . . . . ? 
N6 Eu1 N5 N4 -170.10(16) . . . . ? 
N9 Eu1 N5 N4 -98.12(14) . . . . ? 
N3 Eu1 N5 N4 68.04(15) . . . . ? 
C15 C16 N6 C12 0.6(3) . . . . ? 
C15 C16 N6 Eu1 165.66(15) . . . . ? 
C13 C12 N6 C16 -2.0(3) . . . . ? 
C11 C12 N6 C16 179.95(16) . . . . ? 
C13 C12 N6 Eu1 -167.74(14) . . . . ? 
C11 C12 N6 Eu1 14.19(19) . . . . ? 
O2 Eu1 N6 C16 47.73(17) . . . . ? 
O4 Eu1 N6 C16 -89.77(14) . . . . ? 
O1 Eu1 N6 C16 -2.18(14) . . . . ? 
N2 Eu1 N6 C16 -149.21(13) . . . . ? 
N5 Eu1 N6 C16 -176.57(16) . . . . ? 
N8 Eu1 N6 C16 131.90(14) . . . . ? 
N9 Eu1 N6 C16 75.07(14) . . . . ? 
N3 Eu1 N6 C16 -65.44(16) . . . . ? 
O2 Eu1 N6 C12 -147.39(12) . . . . ? 
O4 Eu1 N6 C12 75.12(13) . . . . ? 
O1 Eu1 N6 C12 162.71(13) . . . . ? 
N2 Eu1 N6 C12 15.68(15) . . . . ? 
N5 Eu1 N6 C12 -11.68(12) . . . . ? 
N8 Eu1 N6 C12 -63.21(13) . . . . ? 
N9 Eu1 N6 C12 -120.05(13) . . . . ? 
N3 Eu1 N6 C12 99.44(13) . . . . ? 
C18 C17 N7 N8 0.6(2) . . . . ? 
C18 C17 N7 B1 -169.84(18) . . . . ? 
N1 B1 N7 C17 -122.0(2) . . . . ? 
N4 B1 N7 C17 120.3(2) . . . . ? 
N1 B1 N7 N8 68.3(2) . . . . ? 
N4 B1 N7 N8 -49.4(2) . . . . ? 
C18 C19 N8 N7 2.3(2) . . . . ? 
C20 C19 N8 N7 -171.33(15) . . . . ? 
C18 C19 N8 Eu1 -169.65(12) . . . . ? 
C20 C19 N8 Eu1 16.7(2) . . . . ? 
C17 N7 N8 C19 -1.8(2) . . . . ? 
B1 N7 N8 C19 169.92(16) . . . . ? 
C17 N7 N8 Eu1 169.73(12) . . . . ? 
B1 N7 N8 Eu1 -18.6(2) . . . . ? 
O2 Eu1 N8 C19 55.12(14) . . . . ? 
O4 Eu1 N8 C19 -156.41(13) . . . . ? 
O1 Eu1 N8 C19 -2.13(18) . . . . ? 
N2 Eu1 N8 C19 147.15(15) . . . . ? 
N5 Eu1 N8 C19 -135.95(15) . . . . ? 
N6 Eu1 N8 C19 -86.18(15) . . . . ? 
N9 Eu1 N8 C19 -16.18(13) . . . . ? 
N3 Eu1 N8 C19 109.71(14) . . . . ? 
O2 Eu1 N8 N7 -115.08(15) . . . . ? 
O4 Eu1 N8 N7 33.38(18) . . . . ? 
O1 Eu1 N8 N7 -172.34(13) . . . . ? 
N2 Eu1 N8 N7 -23.06(14) . . . . ? 
N5 Eu1 N8 N7 53.85(14) . . . . ? 
N6 Eu1 N8 N7 103.61(15) . . . . ? 
N9 Eu1 N8 N7 173.61(16) . . . . ? 
N3 Eu1 N8 N7 -60.50(16) . . . . ? 
C23 C24 N9 C20 -1.1(3) . . . . ? 
C23 C24 N9 Eu1 -169.28(15) . . . . ? 
C21 C20 N9 C24 1.7(3) . . . . ? 
C19 C20 N9 C24 178.12(16) . . . . ? 
C21 C20 N9 Eu1 170.68(14) . . . . ? 
C19 C20 N9 Eu1 -12.9(2) . . . . ? 
O2 Eu1 N9 C24 96.73(15) . . . . ? 
O4 Eu1 N9 C24 -41.71(18) . . . . ? 
O1 Eu1 N9 C24 12.79(15) . . . . ? 
N2 Eu1 N9 C24 161.17(14) . . . . ? 
N5 Eu1 N9 C24 -124.17(15) . . . . ? 
N8 Eu1 N9 C24 -177.35(16) . . . . ? 
N6 Eu1 N9 C24 -65.58(15) . . . . ? 
N3 Eu1 N9 C24 72.01(16) . . . . ? 
O2 Eu1 N9 C20 -71.44(13) . . . . ? 
O4 Eu1 N9 C20 150.12(12) . . . . ? 
O1 Eu1 N9 C20 -155.38(14) . . . . ? 
N2 Eu1 N9 C20 -7.00(15) . . . . ? 
N5 Eu1 N9 C20 67.66(13) . . . . ? 
N8 Eu1 N9 C20 14.48(12) . . . . ? 
N6 Eu1 N9 C20 126.25(13) . . . . ? 
N3 Eu1 N9 C20 -96.16(13) . . . . ? 
O3 C25 O2 Eu1 -26.7(3) . . . . ? 
C26 C25 O2 Eu1 152.68(15) . . . . ? 
O4 Eu1 O2 C25 75.90(18) . . . . ? 
O1 Eu1 O2 C25 9.41(16) . . . . ? 
N2 Eu1 O2 C25 153.34(17) . . . . ? 
N5 Eu1 O2 C25 -149.06(15) . . . . ? 
N8 Eu1 O2 C25 -133.62(17) . . . . ? 
N6 Eu1 O2 C25 -39.8(2) . . . . ? 
N9 Eu1 O2 C25 -69.22(16) . . . . ? 
N3 Eu1 O2 C25 92.20(17) . . . . ? 
O5 C27 O4 Eu1 10.9(3) . . . . ? 
C28 C27 O4 Eu1 -169.72(16) . . . . ? 
O2 Eu1 O4 C27 -61.61(18) . . . . ? 
O1 Eu1 O4 C27 3.55(16) . . . . ? 
N2 Eu1 O4 C27 -140.93(16) . . . . ? 
N5 Eu1 O4 C27 146.69(17) . . . . ? 
N8 Eu1 O4 C27 165.67(15) . . . . ? 
N6 Eu1 O4 C27 81.78(16) . . . . ? 
N9 Eu1 O4 C27 56.14(19) . . . . ? 
N3 Eu1 O4 C27 -78.31(16) . . . . ? 
 
loop_ 
 _geom_hbond_atom_site_label_D 
 _geom_hbond_atom_site_label_H 
 _geom_hbond_atom_site_label_A 
 _geom_hbond_distance_DH 
 _geom_hbond_distance_HA 
 _geom_hbond_distance_DA 
 _geom_hbond_angle_DHA 
 _geom_hbond_site_symmetry_A 
O1 H1B O5  0.832(17) 1.775(18) 2.593(2) 167(3) . 
O1 H1A O3  0.858(17) 1.775(18) 2.619(2) 167(3) . 
 
_diffrn_measured_fraction_theta_max    0.886 
_diffrn_reflns_theta_full              28.00 
_diffrn_measured_fraction_theta_full   0.990 
_refine_diff_density_max    1.336 
_refine_diff_density_min   -0.986 
_refine_diff_density_rms    0.087 

_vrf_PUBL024_GLOBAL
;
PROBLEM: The number of authors is greater than 5.
RESPONSE: 'E.A.M. and A.V.Y. synthesized, characterized the compounds, provided photo- and triboluminescence experiments; A.W.A. obtained the mass-spectra; M.Z. performed X-ray crystallographic measurements; E.A.M., A.V.Y and Y.V.K. made electroluminescence study; M.A.K. and I.L.E. made ICP-AES analysis; E.A.M., A.W.A, V.V.P. and A.V.Y. co-wrote the paper.'
;
